# Supplementary material for: D‐Aspartate treatment attenuates myelin damage and stimulates myelin repair
Source: PubMed Central journal article supplement (PMC6328990; doi:10.15252/emmm.201809278), 2018-12-17
Supplement: EMMM-11-e9278-s001.pdf [file EMMM-11-e9278-s001.pdf]

# APPENDIX

Complete statistical results and exact P-values for each figure.

Table of contents:

|                          | <b>page</b> |
|--------------------------|-------------|
| Appendix Table S1 .....  | 2           |
| Appendix Table S2 .....  | 3           |
| Appendix Table S3 .....  | 4           |
| Appendix Table S4 .....  | 5           |
| Appendix Table S5 .....  | 6           |
| Appendix Table S6 .....  | 7           |
| Appendix Table S7 .....  | 8           |
| Appendix Table S8 .....  | 9           |
| Appendix Table S9 .....  | 10          |
| Appendix Table S10 ..... | 11          |

**Appendix Table S1**

| <b>FIGURE</b>          | <b>COMPARISON</b>                                                                                 | <b>P VALUE</b>                       | <b>POST HOC TEST</b>                                                                                  |
|------------------------|---------------------------------------------------------------------------------------------------|--------------------------------------|-------------------------------------------------------------------------------------------------------|
| <b>1A, left panel</b>  | ctrl vs D-Asp 10 $\mu$ M<br>ctrl vs D-Asp 100 $\mu$ M<br>ctrl vs D-Asp 200 $\mu$ M<br>ctrl vs PMA | ns<br>0.0431<br>< 0.0001<br>< 0.0001 | <b>Tukey</b>                                                                                          |
| <b>1A, right panel</b> | ctrl vs D-Asp 10 $\mu$ M<br>ctrl vs D-Asp 100 $\mu$ M<br>ctrl vs D-Asp 200 $\mu$ M<br>ctrl vs PMA | ns<br>0.0024<br>0.0005<br>< 0.0001   | <b>Tukey</b>                                                                                          |
| <b>1B</b>              | ctrl vs D-Asp 100 $\mu$ M<br>ctrl vs D-Asp 200 $\mu$ M<br>ctrl vs PMA                             | 0.0224<br>0.0002<br>0.0043           | <b>Bonferroni</b>                                                                                     |
| <b>1C</b>              | ctrl vs D-Asp (3d)                                                                                | 0.0438                               | <b>Student's <i>t</i>-tests</b>                                                                       |
| <b>1F, f</b>           | ctrl vs D-Asp (Low)<br>ctrl vs D-Asp (Medium)<br>ctrl vs D-Asp (M-High)                           | 0.001<br>0.0083<br>0.0001            | <b>Student's <i>t</i>-tests</b><br><b>Student's <i>t</i>-tests</b><br><b>Student's <i>t</i>-tests</b> |
| <b>1F, g</b>           | ctrl vs D-Asp (MAG+ cells)                                                                        | 0.0002                               | <b>Student's <i>t</i>-tests</b>                                                                       |

**Appendix Table S2**

| <b>FIGURE</b> | <b>COMPARISON</b>                                 | <b>P VALUE</b>       | <b>POST HOC TEST</b>            |
|---------------|---------------------------------------------------|----------------------|---------------------------------|
| <b>2C</b>     | ctrl vs D-Asp                                     | < 0.0001             | <b>Student's <i>t</i>-tests</b> |
| <b>2D</b>     | ctrl vs D-Asp                                     | 0.0457               | <b>Student's <i>t</i>-tests</b> |
| <b>2G</b>     | ctrl vs LPC (6dpl)<br>LPC vs LPC + D-Asp (6dpl)   | 0.0248<br>0.0025     | <b>Bonferroni</b>               |
| <b>2H</b>     | ctrl vs LPC (6dpl)<br>LPC vs LPC + D-Asp (6dpl)   | 0.0033<br>< 0.0001   | <b>Bonferroni</b>               |
| <b>2J</b>     | ctrl vs LPC (10dpl)<br>LPC vs LPC + D-Asp (10dpl) | < 0.0001<br>< 0.0001 | <b>Bonferroni</b>               |

**Appendix Table S3**

| <b>FIGURE</b>          | <b>COMPARISON</b>         | <b>P VALUE</b> | <b>POST HOC TEST</b> |
|------------------------|---------------------------|----------------|----------------------|
| <b>3A, left panel</b>  | ctrl vs D-Asp             | 0.0012         | <b>Tukey</b>         |
|                        | D-Asp vs MK-801           | 0.0096         |                      |
| <b>3A, right panel</b> | ctrl vs D-Asp             | 0.0001         | <b>Tukey</b>         |
|                        | D-Asp vs D-Asp + BED      | 0.0009         |                      |
|                        | D-Asp vs D-Asp + YM244769 | 0.0041         |                      |
| <b>3B, left panel</b>  | ctrl vs D-Asp             | 0.0002         | <b>Tukey</b>         |
|                        | D-Asp vs MK-801           | 0.0002         |                      |
| <b>3B, right panel</b> | ctrl vs D-Asp             | 0.0006         | <b>Tukey</b>         |
|                        | D-Asp vs D-Asp + BED      | 0.0024         |                      |
|                        | D-Asp vs D-Asp + YM244769 | 0.0104         |                      |
| <b>3C, m</b>           | D-Asp vs D-Asp + MK-801   | 0.0341         | <b>Bonferroni</b>    |
|                        | D-Asp vs D-Asp + BED      | < 0.0001       |                      |
|                        | D-Asp vs D-Asp + YM244769 | < 0.0001       |                      |
| <b>3C, n</b>           | D-Asp vs D-Asp + MK-801   | 0.0054         | <b>Bonferroni</b>    |
|                        | D-Asp vs D-Asp+ BED       | < 0.0001       |                      |
|                        | D-Asp vs D-Asp + YM244769 | < 0.0001       |                      |
| <b>3D</b>              | ctrl vs D-Asp 10 $\mu$ M  | 0.0452         | <b>Tukey</b>         |
|                        | ctrl vs D-Asp 100 $\mu$ M | 0.0015         |                      |
|                        | ctrl vs D-Asp 200 $\mu$ M | 0.0003         |                      |
|                        | ctrl vs PMA               | < 0.0001       |                      |
| <b>3E</b>              | ctrl vs D-Asp             | 0.0107         | <b>Tukey</b>         |
|                        | D-Asp vs MK-801           | 0.0369         |                      |

Appendix Table S4

| FIGURE    | COMPARISON                      | P VALUE  | POST HOC TEST     |
|-----------|---------------------------------|----------|-------------------|
| <b>4A</b> | ctrl vs D-Asp                   | < 0.0001 | <b>Bonferroni</b> |
|           | D-Asp vs D-Asp + MK-801         | < 0.0001 |                   |
|           | D-Asp vs D-Asp + APV            | < 0.0001 |                   |
|           | D-Asp + MK-801 vs D-Asp + APV   | ns       |                   |
| <b>4a</b> | ctrl vs D-Asp                   | < 0.0001 | <b>Bonferroni</b> |
|           | D-Asp vs D-Asp + MK-801         | < 0.0001 |                   |
|           | D-Asp vs D-Asp + APV            | < 0.0001 |                   |
|           | D-Asp + MK-801 vs D-Asp + APV   | ns       |                   |
| <b>4B</b> | ctrl vs D-Asp                   | < 0.0001 | <b>Bonferroni</b> |
|           | D-Asp vs D-Asp + MK-801         | < 0.0001 |                   |
|           | D-Asp vs D-Asp + APV            | < 0.0001 |                   |
|           | D-Asp + MK vs D-Asp + APV       | ns       |                   |
| <b>4b</b> | ctrl vs D-Asp                   | < 0.0001 | <b>Bonferroni</b> |
|           | D-Asp vs D-Asp + MK-801         | < 0.0001 |                   |
|           | D-Asp vs D-Asp + APV            | < 0.0001 |                   |
|           | D-Asp + MK-801 vs D-Asp + APV   | ns       |                   |
| <b>4C</b> | ctrl vs D-Asp                   | < 0.0001 | <b>Bonferroni</b> |
|           | D-Asp vs D-Asp + BED            | < 0.0001 |                   |
|           | D-Asp vs D-Asp + YM244769       | < 0.0001 |                   |
| <b>4c</b> | ctrl vs D-Asp                   | < 0.0001 | <b>Bonferroni</b> |
|           | D-Asp vs D-Asp + BED            | < 0.0001 |                   |
|           | D-Asp vs D-Asp + YM244769       | < 0.0001 |                   |
|           | D-Asp + BED vs D-Asp + YM244769 | ns       |                   |
| <b>4D</b> | ctrl vs D-Asp                   | < 0.0001 | <b>Bonferroni</b> |
|           | D-Asp vs D-Asp + BED            | < 0.0001 |                   |
|           | D-Asp vs D-Asp + YM244769       | < 0.0001 |                   |
|           | D-Asp + BED vs D-Asp + YM244769 | ns       |                   |
| <b>4d</b> | ctrl vs D-Asp                   | < 0.0001 | <b>Bonferroni</b> |
|           | D-Asp vs D-Asp + BED            | < 0.0001 |                   |
|           | D-Asp vs D-Asp + YM244769       | < 0.0001 |                   |
|           | D-Asp + BED vs D-Asp + YM244769 | ns       |                   |
| <b>4E</b> | ctrl vs siCtl                   | ns       | <b>Bonferroni</b> |
|           | ctrl + siCtl vs D-Asp + siCtl   | < 0.0001 |                   |
|           | D-Asp + siCtl vs D-Asp + siNCX3 | < 0.0001 |                   |
| <b>4e</b> | ctrl vs siCtl                   | ns       | <b>Bonferroni</b> |
|           | ctrl + siCtl vs D-Asp + siCtl   | < 0.0001 |                   |
|           | D-Asp + siCtl vs D-Asp + siNCX3 | < 0.0001 |                   |
| <b>4F</b> | ctrl vs nex3+/+                 | < 0.0001 | <b>Bonferroni</b> |
|           | nex3+/+ vs nex3+/-              | < 0.0001 |                   |
|           | nex3+/+ vs nex3-/-              | 0.006    |                   |
| <b>4f</b> | ctrl vs nex3+/+                 | < 0.0001 | <b>Bonferroni</b> |
|           | nex3+/+ vs nex3+/-              | ns       |                   |
|           | nex3+/+ vs nex3-/-              | 0.006    |                   |

**Appendix Table S5**

| <b>FIGURE</b> | <b>COMPARISON</b>                          | <b>P VALUE</b> | <b>POST HOC TEST</b> |
|---------------|--------------------------------------------|----------------|----------------------|
| <b>5A</b>     | 1μM AMPA vs 10μM AMPA                      | <0.001         | <b>Bonferroni</b>    |
|               | 1μM AMPA vs 100μM AMPA                     | <0.001         |                      |
|               | 10μM AMPA vs 100μM AMPA                    | <0.001         |                      |
| <b>5C</b>     | AMPA (I) vs AMPA + DNQX                    | <0.001         | <b>Bonferroni</b>    |
|               | AMPA (II) vs AMPA + DNQX                   | <0.001         |                      |
|               | AMPA (IV) vs AMPA + DNQX                   | <0.001         |                      |
| <b>5D</b>     | D-Asp (I) vs D-Asp + DNQX                  | <0.001         | <b>Bonferroni</b>    |
|               | D-Asp (II) vs D-Asp + DNQX                 | <0.001         |                      |
|               | D-Asp (IV) vs D-Asp + DNQX                 | <0.001         |                      |
| <b>5G</b>     | AMPA (I) vs AMPA + DNQX                    | <0.001         | <b>Bonferroni</b>    |
|               | AMPA (II) vs AMPA (IV)                     | <0.001         |                      |
|               | AMPA (II) vs AMPA + DNQX                   | 0.002          |                      |
|               | AMPA (IV) vs AMPA + DNQX                   | <0.001         |                      |
|               | AMPA (IV) vs AMPA (I)                      | 0.044          |                      |
| <b>5H</b>     | D-Asp (I) vs D-Asp + DNQX                  | <0.001         | <b>Bonferroni</b>    |
|               | D-Asp (I) vs D-Asp + DNQX + MK-801         | <0.001         |                      |
|               | D-Asp (I) vs D-Asp + DNQX + MK-801 + PDC   | <0.001         |                      |
|               | D-Asp (II) vs D-Asp + DNQX                 | <0.001         |                      |
|               | D-Asp (II) vs D-Asp + DNQX + MK-801        | <0.001         |                      |
|               | D-Asp (II) vs D-Asp + DNQX + MK-801 + PDC  | <0.001         |                      |
|               | D-Asp + DNQX vs D-Asp (VI)                 | <0.001         |                      |
|               | D-Asp+DNQX+MK-801 vs D-Asp+DNQX+MK-801+PDC | 0.023          |                      |
|               | D-Asp + DNQX + MK-801 + PDC vs D-Asp (VI)  | <0.001         |                      |
|               | D-Asp (VI) vs D-Asp (I)                    | 0.001          |                      |
|               | D-Asp (VI) vs D-Asp (II)                   | <0.001         |                      |
|               | D-Asp + DNQX + MK-801 vs D-Asp (II)        | <0.001         |                      |

Appendix Table S6

| FIGURE                     | COMPARISON                 | P VALUE  | POST HOC TEST     |
|----------------------------|----------------------------|----------|-------------------|
| <b>6B, left panel</b>      | ctrl vs cpz (1d)           | 0.0018   | <b>Bonferroni</b> |
|                            | cpz vs D-Asp (1d)          | 0.0399   |                   |
| <b>6B, right panel</b>     | ctrl vs cpz                | 0.0002   | <b>Bonferroni</b> |
|                            | cpz vs cpz + D-Asp         | 0.0281   |                   |
| <b>6C, left panel</b>      | ctrl vs cpz (1d)           | 0.0026   | <b>Bonferroni</b> |
|                            | cpz vs D-Asp (1d)          | 0.0371   |                   |
| <b>6C, right panel</b>     | ctrl vs cpz                | < 0.0001 | <b>Bonferroni</b> |
|                            | cpz vs cpz + D-Asp         | 0.0018   |                   |
| <b>6D, left panel</b>      | ctrl vs vehicle (3d)       | 0.0038   | <b>Bonferroni</b> |
|                            | cpz vs D-Asp (II) (3d)     | 0.0303   |                   |
| <b>6D, middle panel</b>    | ctrl vs vehicle            | < 0.0001 | <b>Bonferroni</b> |
|                            | ctrl vs cpz+D-Asp (I)      | < 0.0001 |                   |
| <b>6D, right panel</b>     | ctrl vs vehicle            | < 0.0001 | <b>Bonferroni</b> |
|                            | cpz vs cpz+D-Asp (II)      | < 0.0001 |                   |
| <b>6E, left panel</b>      | cpz vs cpz + D-Asp (2d)    | 0.0035   | <b>Bonferroni</b> |
|                            | ctrl vs cpz (3d)           | < 0.0001 | <b>Bonferroni</b> |
|                            | cpz vs cpz + D-Asp (3d)    | 0.0006   |                   |
| <b>6E, right panel</b>     | ctrl vs cpz                | 0.0005   | <b>Bonferroni</b> |
|                            | ctrl vs cpz + D-Asp        | 0.0172   |                   |
| <b>6F, left panel</b>      | ctrl vs cpz (3d)           | 0.0178   | <b>Bonferroni</b> |
|                            | cpz vs cpz + D-Asp (3d)    | 0.039    |                   |
| <b>6F, right panel</b>     | ctrl vs cpz                | < 0.0001 | <b>Bonferroni</b> |
|                            | ctrl vs cpz + D-Asp        | 0.0132   |                   |
| <b>6G, left panel</b>      | ctrl vs vehicle (1d)       | < 0.0001 | <b>Bonferroni</b> |
|                            | ctrl vs D-Asp (II) (1d)    | 0.0153   |                   |
|                            | vehicle vs D-Asp (II) (1d) | 0.0045   |                   |
|                            | ctrl vs vehicle (2d)       | 0.0356   | <b>Bonferroni</b> |
|                            | vehicle vs D-Asp (II) (2d) | 0.0079   |                   |
|                            | ctrl vs vehicle (3d)       | 0.0061   | <b>Bonferroni</b> |
| vehicle vs D-Asp (II) (3d) | 0.0394                     |          |                   |
| <b>6G, right panel</b>     | ctrl vs vehicle            | < 0.0001 | <b>Bonferroni</b> |
|                            | vehicle vs D-Asp (II)      | < 0.0001 |                   |

**Appendix Table S7**

| <b>FIGURE</b>           | <b>COMPARISON</b>                            | <b>P VALUE</b>                 | <b>POST HOC TEST</b> |
|-------------------------|----------------------------------------------|--------------------------------|----------------------|
| <b>7A, j</b>            | ctrl vs cpz<br>cpz vs cpz + D-Asp            | < 0.0001<br>< 0.0001           | <b>Bonferroni</b>    |
| <b>7A, k</b>            | ctrl vs cpz<br>cpz vs cpz + D-Asp            | <0.05<br><0.05                 | <b>Newman-Keuls</b>  |
| <b>7B</b>               | ctrl vs cpz<br>ctrl vs D-Asp<br>cpz vs D-Asp | < 0.0001<br>0.0303<br>< 0.0001 | <b>Bonferroni</b>    |
| <b>7C, j</b>            | ctrl vs cpz<br>cpz vs cpz + D-Asp            | < 0.0001<br>0.0002             | <b>Bonferroni</b>    |
| <b>7C, k</b>            | ctrl vs cpz<br>cpz vs cpz + D-Asp            | < 0.0001<br>0.0062             | <b>Bonferroni</b>    |
| <b>7D, middle panel</b> | ctrl vs cpz<br>ctrl vs cpz + D-Asp           | 0.028<br>0.0365                | <b>Bonferroni</b>    |
| <b>7D, right panel</b>  | ctrl vs cpz<br>cpz vs cpz + D-Asp            | 0.0045<br>0.0107               | <b>Bonferroni</b>    |



Appendix Table S8

| FIGURE                    | COMPARISON                                          | P VALUE  | POST HOC TEST                   |
|---------------------------|-----------------------------------------------------|----------|---------------------------------|
| <b>8A, k, left panel</b>  | ctrl vs cpz ( <b>Olig2+ cells</b> )                 | ≤ 0.0001 | <b>Newman-Keuls</b>             |
|                           | ctrl vs cpz + D-Asp ( <b>Olig2+ cells</b> )         | ≤ 0.0001 |                                 |
|                           | cpz vs cpz + D-Asp ( <b>Olig2+ cells</b> )          | ≤ 0.05   |                                 |
|                           | ctrl vs cpz ( <b>Olig2+/CC1+ cells</b> )            | ≤ 0.0001 | <b>Newman-Keuls</b>             |
|                           | ctrl vs cpz + D-Asp ( <b>Olig2+/CC1+ cells</b> )    | ≤ 0.0001 |                                 |
|                           | cpz vs cpz + D-Asp ( <b>Olig2+/CC1+ cells</b> )     | ≤ 0.05   |                                 |
| <b>8A, k, right panel</b> | ctrl vs vehicle ( <b>Olig2+cells</b> )              | ≤ 0.0001 | <b>Newman-Keuls</b>             |
|                           | ctrl vs cpz + D-Asp ( <b>Olig2+ cells</b> )         | ≤ 0.001  |                                 |
|                           | vehicle vs cpz + D-Asp ( <b>Olig2+ cells</b> )      | ≤ 0.01   |                                 |
|                           | ctrl vs vehicle ( <b>Olig2+/CC1+ cells</b> )        | ≤ 0.0001 | <b>Newman-Keuls</b>             |
|                           | ctrl vs cpz + D-Asp ( <b>Olig2+/CC1+ cells</b> )    | ≤ 0.0001 |                                 |
|                           | vehicle vs cpz + D-Asp ( <b>Olig2+/CC1+ cells</b> ) | ≤ 0.01   |                                 |
| <b>8C</b>                 | cpz vs cpz + D-Asp                                  | 0.0004   | <b>Student's <i>t</i>-tests</b> |
| <b>8E</b>                 | vehicle vs D-Asp (0.2 μm axons)                     | 0.0097   | <b>Student's <i>t</i>-tests</b> |
|                           | vehicle vs D-Asp (0.3 μm axons)                     | 0.0005   | <b>Student's <i>t</i>-tests</b> |
|                           | vehicle vs D-Asp (0.4 μm axons)                     | < 0.0001 | <b>Student's <i>t</i>-tests</b> |
|                           | vehicle vs D-Asp (0.5 μm axons)                     | < 0.0001 | <b>Student's <i>t</i>-tests</b> |
|                           | vehicle vs D-Asp (0.6 μm axons)                     | 0.0157   | <b>Student's <i>t</i>-tests</b> |
|                           | vehicle vs D-Asp (0.7 μm axons)                     | < 0.0001 | <b>Student's <i>t</i>-tests</b> |
| <b>8F</b>                 | vehicle vs D-Asp (0.2 μm axons)                     | 0.0347   | <b>Student's <i>t</i>-tests</b> |
|                           | vehicle vs D-Asp (0.3 μm axons)                     | 0.0289   | <b>Student's <i>t</i>-tests</b> |
|                           | vehicle vs D-Asp (0.4 μm axons)                     | 0.0457   | <b>Student's <i>t</i>-tests</b> |

**Appendix Table S9**

| <b>FIGURE</b>  | <b>COMPARISON</b>                      | <b>P VALUE</b>       | <b>POST HOC TEST</b> |
|----------------|----------------------------------------|----------------------|----------------------|
| <b>EV1A</b>    | ctrl vs AMPA<br>AMPA vs AMPA + DNQX    | < 0.0001<br>< 0.0001 | <b>Bonferroni</b>    |
| <b>EV1B</b>    | ctrl vs D-Asp<br>D-Asp vs D-Asp + DNQX | < 0.0001<br>< 0.0001 | <b>Bonferroni</b>    |
| <b>EV1B, b</b> | ctrl vs D-Asp<br>D-Asp vs D-Asp + DNQX | < 0.0001<br>< 0.0001 | <b>Bonferroni</b>    |
| <b>EV1C</b>    | ctrl vs D-Asp<br>D-Asp vs D-Asp + CNQX | < 0.0001<br>< 0.0001 | <b>Bonferroni</b>    |
| <b>EV1C, c</b> | ctrl vs D-Asp<br>D-Asp vs D-Asp + CNQX | < 0.0001<br>< 0.0001 | <b>Bonferroni</b>    |
| <b>EV1D</b>    | ctrl vs D-Asp<br>D-Asp vs D-Asp + PDC  | < 0.0001<br>< 0.0001 | <b>Bonferroni</b>    |
| <b>EV1D, d</b> | ctrl vs D-Asp<br>D-Asp vs D-Asp + PDC  | < 0.0001<br>< 0.0001 | <b>Bonferroni</b>    |

**Appendix Table S10**

| <b>FIGURE</b>            | <b>COMPARISON</b>       | <b>P VALUE</b> | <b>POST HOC TEST</b> |
|--------------------------|-------------------------|----------------|----------------------|
| <b>EV2A, left panel</b>  | ctrl vs cpz (3d)        | 0.0226         | <b>Bonferroni</b>    |
|                          | cpz vs cpz + D-Asp (3d) | 0.031          |                      |
| <b>EV2A, right panel</b> | ctrl vs cpz             | 0.0181         | <b>Bonferroni</b>    |
| <b>EV2B, right panel</b> | ctrl vs cpz             | 0.0058         | <b>Bonferroni</b>    |
|                          | cpz vs D-Asp            | 0.0414         |                      |
| <b>EV2C, left panel</b>  | ctrl vs cpz (2d)        | 0.03           | <b>Bonferroni</b>    |
|                          | cpz vs D-Asp (II) (2d)  | 0.0409         |                      |
|                          | ctrl vs cpz (3d)        | 0.0114         | <b>Bonferroni</b>    |
|                          | cpz vs D-Asp (II) (3d)  | 0.01           |                      |
| <b>EV2C, right panel</b> | ctrl vs cpz             | 0.0005         | <b>Bonferroni</b>    |
|                          | cpz vs D-Asp (II)       | 0.0182         |                      |
