# Supplementary material for: D‐Aspartate treatment attenuates myelin damage and stimulates myelin repair
Source: PubMed Central journal article supplement (PMC6328990; doi:10.15252/emmm.201809278), 2018-12-17
Supplement: EMMM-11-e9278-s002.pdf [file EMMM-11-e9278-s002.pdf]

## Expanded View Figures

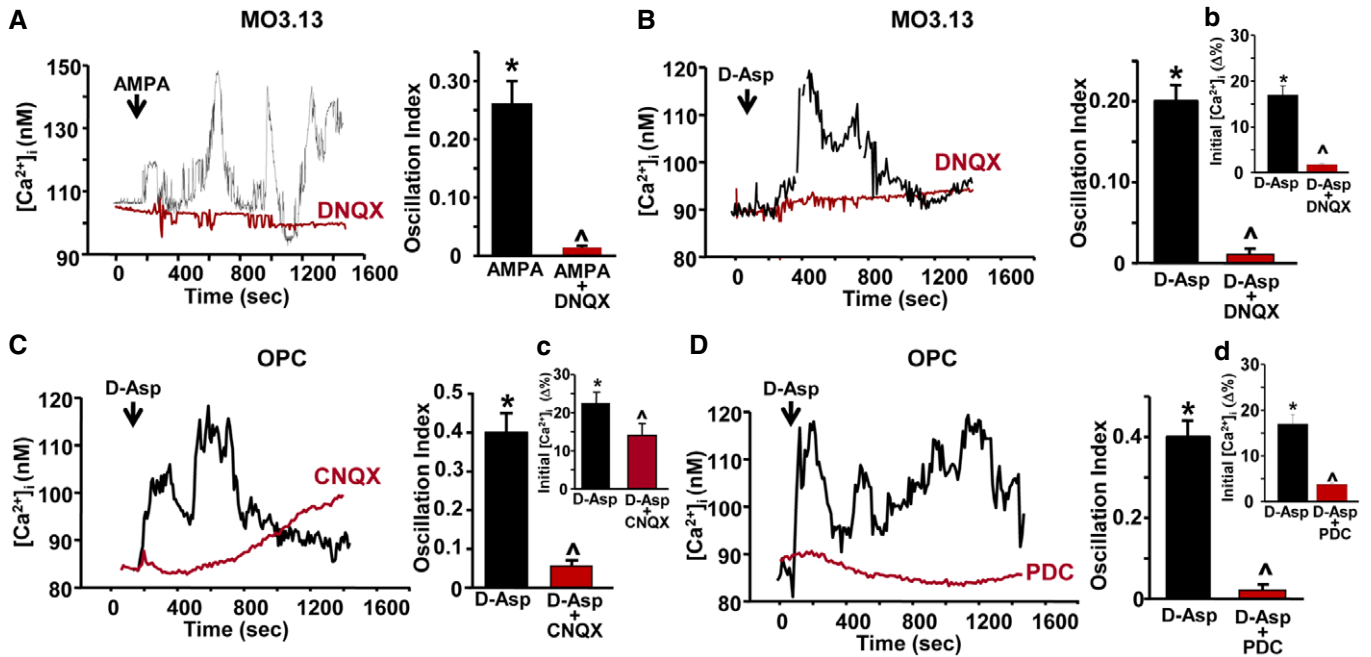

**Figure EV1. Effect of AMPA receptors and glutamate transporters blockade on D-Asp elicited  $[Ca^{2+}]_i$  increase in oligodendrocyte precursors.**

- A Left: Superimposed single-cell traces representative of the effect of 10  $\mu$ M AMPA on  $[Ca^{2+}]_i$  detected in MO3.13 cells in the absence or in the presence of 10  $\mu$ M DNQX. Right: Quantification of the oscillation index in MO3.13 cells after 10  $\mu$ M AMPA exposure in the absence or in the presence of 10  $\mu$ M DNQX.
- B Left: Superimposed single-cell traces representative of the effect of 100  $\mu$ M D-Asp on  $[Ca^{2+}]_i$  detected in MO3.13 cells in the absence or in the presence of 10  $\mu$ M DNQX. Right: Quantification of the oscillation index in MO3.13 progenitors after 100  $\mu$ M D-Asp exposure in the absence or in the presence of 10  $\mu$ M DNQX. (b) Quantification of the initial  $[Ca^{2+}]_i$  increase elicited by D-Asp in MO3.13 cells measured as  $\Delta\%$  of peak versus basal values in the absence or in the presence of 10  $\mu$ M DNQX.
- C Left: Superimposed single-cell traces representative of the effect of 100  $\mu$ M D-Asp on  $[Ca^{2+}]_i$  detected in OPC in the absence or in the presence of 25  $\mu$ M CNQX. CNQX was preincubated 5 min before registration. Right: Quantification of the oscillation index in OPC after 100  $\mu$ M D-Asp exposure in the absence or in the presence of 25  $\mu$ M CNQX. (c) Quantification of the initial  $[Ca^{2+}]_i$  increase elicited by D-Asp in OPC measured as  $\Delta\%$  of peak versus basal values in the absence or in the presence of 25  $\mu$ M CNQX.
- D Left: Superimposed single-cell traces representative of the effect of 100  $\mu$ M D-Asp on  $[Ca^{2+}]_i$  detected in OPC in the absence or in the presence of 20  $\mu$ M L-trans-pyrrolidine-2,4-dicarboxylic acid (PDC). PDC was preincubated 5 min before registration. Right: Quantification of the oscillation index in OPC after 100  $\mu$ M D-Asp exposure in the absence or in the presence of 20  $\mu$ M PDC. (d) Quantification of the initial  $[Ca^{2+}]_i$  increase elicited by D-Asp in OPC measured as  $\Delta\%$  of peak versus basal values in the absence or in the presence of 20  $\mu$ M PDC.

Data information: The values represent the mean  $\pm$  SEM from three independent experimental sessions. Level of significance was determined by using: in (A) one-way ANOVA  $P < 0.001$  followed by Bonferroni *post hoc* test,  $*P < 0.05$  versus control (basal value),  $^{\wedge}P < 0.05$  versus AMPA. Data are reported as mean of 15 cells in each group,  $n = 3$  biological replicates; (B and b) one-way ANOVA  $P < 0.001$  followed by Bonferroni *post hoc* test,  $*P < 0.05$  versus control (basal value),  $^{\wedge}P < 0.05$  versus D-Asp. Data are reported as mean of 22–30 cells in each group,  $n = 3$  biological replicates; (C and c) one-way ANOVA  $P < 0.001$  and  $P = 0.023$ , respectively, followed by Bonferroni *post hoc* test,  $*P < 0.05$  versus control (basal value);  $^{\wedge}P < 0.05$  versus D-Asp. Data are reported as mean of 18–20 cells in each group,  $n = 3$  biological replicates; (D and d) one-way ANOVA  $P < 0.001$  followed by Bonferroni *post hoc* test,  $*P < 0.05$  versus control (basal value);  $^{\wedge}P < 0.05$  versus D-Asp. Data are reported as mean of 20 cells in each group,  $n = 3$  biological replicates. See the exact  $P$ -values from comparisons tests in Appendix Table S9.

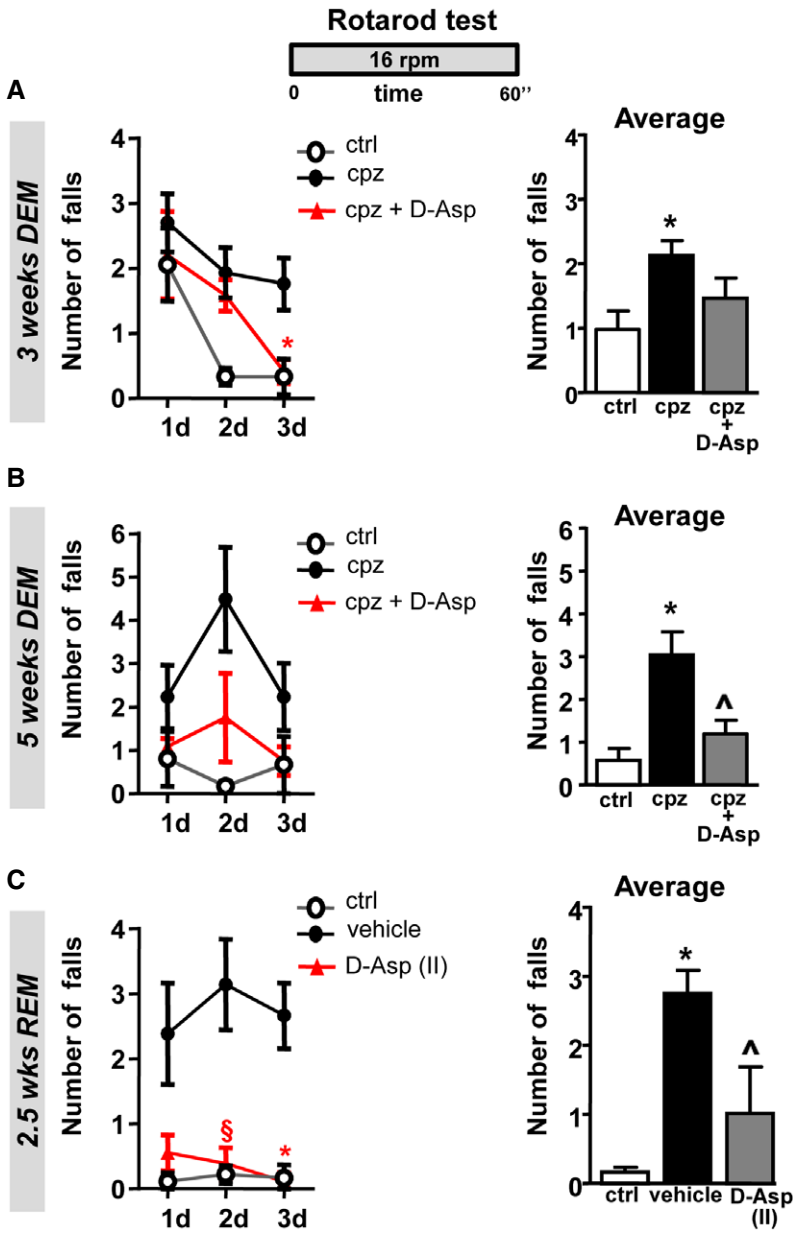

**Figure EV2. Effects of D-Asp treatment on motor coordination performance in fixed rotarod test.**

A, B Number of falls during daily training in fixed-speed rotarod test (left panel, averaged across three trials per day) and average of falls over 3 consecutive days (right panel) recorded in control (open circles), cuprizone- (filled black circles), and D-Asp-treated (filled red triangles) mice at 3 weeks (A) and 5 weeks (B) of cuprizone feeding.

C Number of falls during daily training in fixed-speed rotarod test (left panel, averaged across three trials per day) and average of falls over 3 consecutive days (right panel) recorded after 2.5 weeks of remyelination in control (open circles), cuprizone- (filled black circles), and D-Asp-treated mice. D-Asp (II) (filled red triangles) refers to the group of mice which received D-Asp during the last week of cuprizone feeding and for 2.5 additional weeks after cuprizone withdrawal. DEM, demyelination; REM, remyelination.

Data information: The values represent the means  $\pm$  SEM ( $n = 6$  mice for each group). Level of significance was determined by using: in (A–C) left panels (daily training), for each day (d) one-way ANOVA  $P = 0.0067$  (A),  $P = 0.0111$  (C, 2 day), and  $P = 0.0029$  (C, 3 day) followed by Bonferroni *post hoc* test,  $^{\S}P < 0.05$  versus cpz at day 2;  $^*P < 0.05$  versus cpz at day 3 ( $n = 6$  mice for each group). In (A–C) right panels (average): one-way ANOVA  $P = 0.0165$  (A),  $P = 0.0025$  (B),  $P = 0.0003$  (C), followed by Bonferroni *post hoc* test,  $^*P < 0.05$  versus control;  $^{\wedge}P < 0.05$  versus cpz or vehicle (veh). See the exact  $P$ -values from comparisons tests in Appendix Table S10.
