# Supplementary material for: D‐Aspartate treatment attenuates myelin damage and stimulates myelin repair
Source: PubMed Central journal article supplement (PMC6328990; doi:10.15252/emmm.201809278), 2018-12-17

# Figure 2D

Not denaturated samples

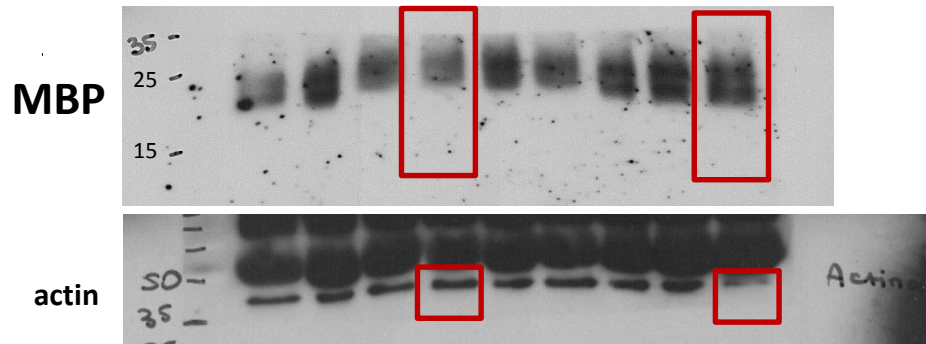

Denaturated samples

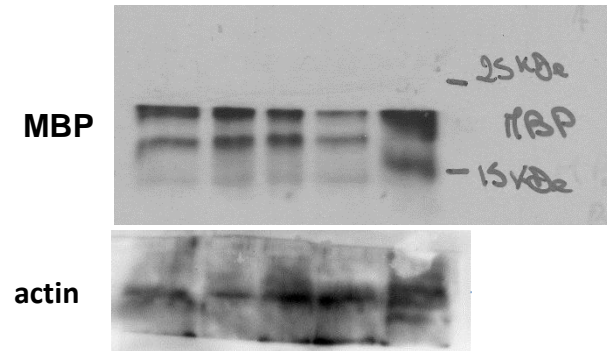

# Figure 2G

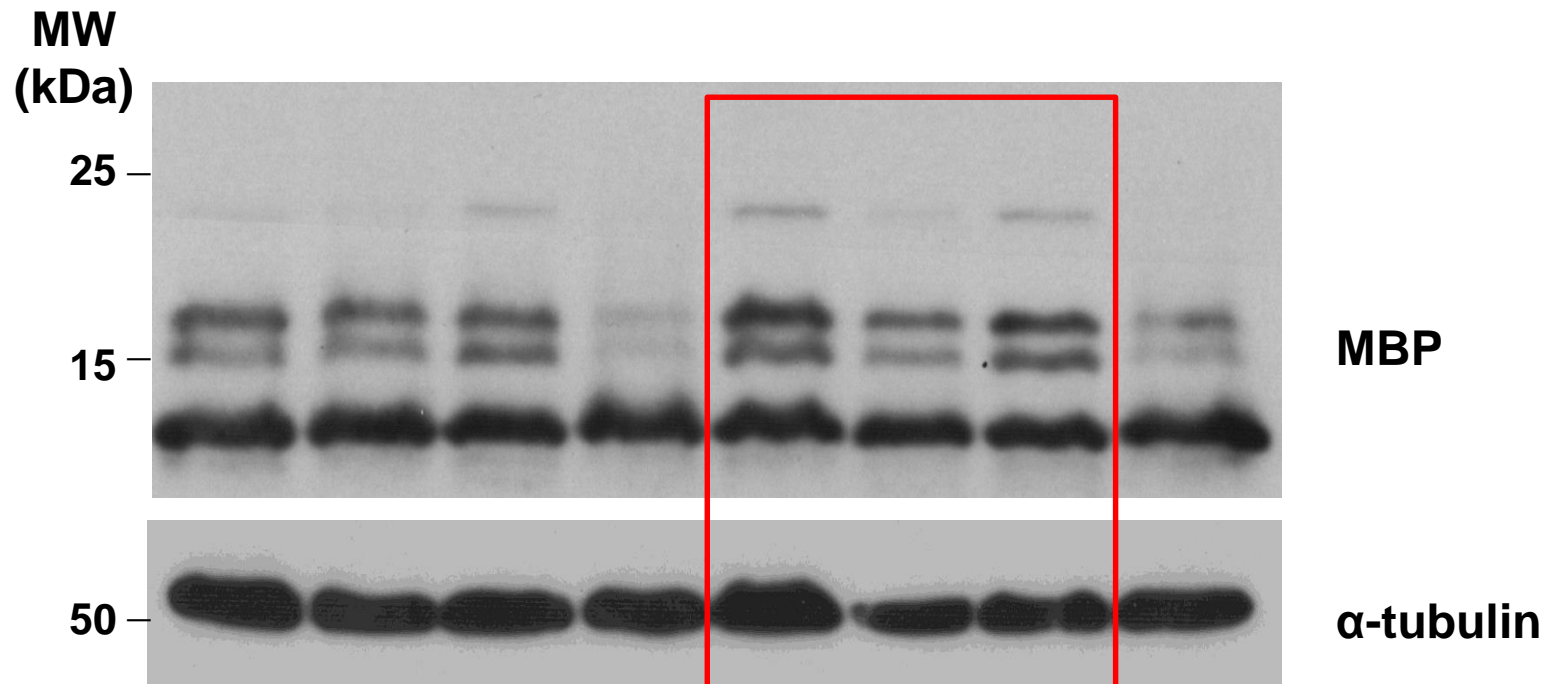

Supplement: EMMM-11-e9278-s004.pdf [file EMMM-11-e9278-s004.pdf]
