# Supplementary material for: D‐Aspartate treatment attenuates myelin damage and stimulates myelin repair
Source: PubMed Central journal article supplement (PMC6328990; doi:10.15252/emmm.201809278), 2018-12-17

# Figure 7B

MW  
(kDa)

25

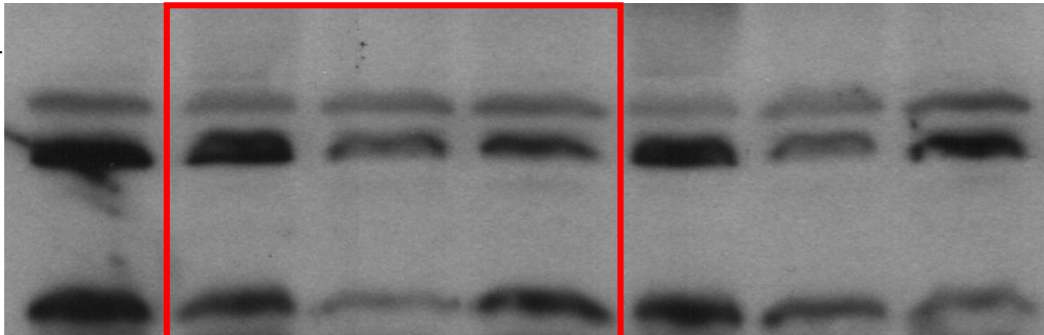

MBP

50

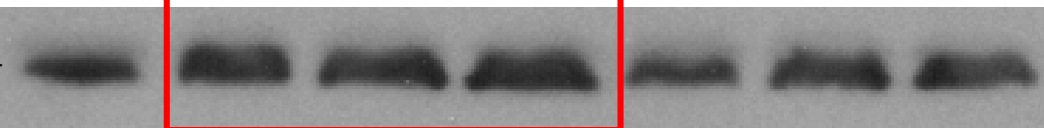

$\alpha$ -tubulin

**Figure 7C**

**GFAP**

**Iba1**

**DAPI**

**Control**

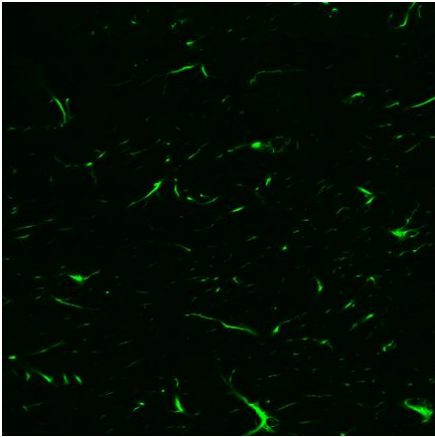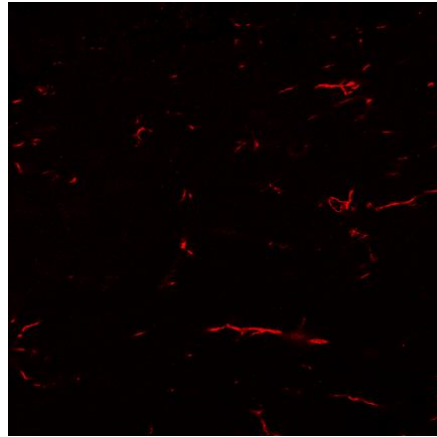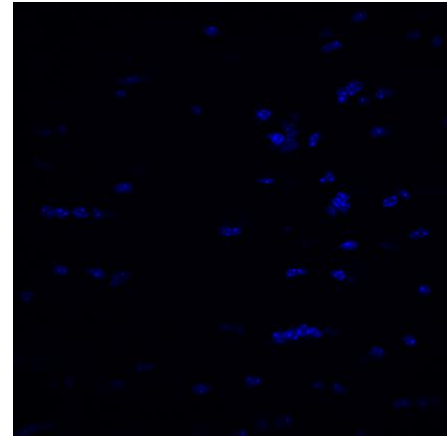

**Cpz**

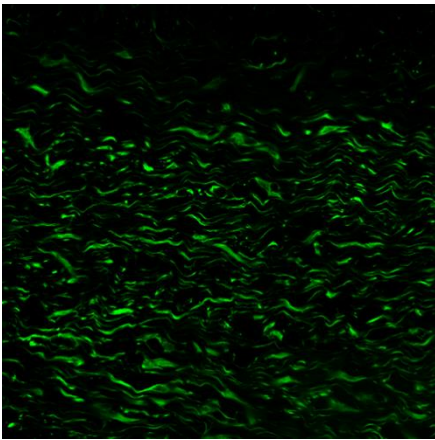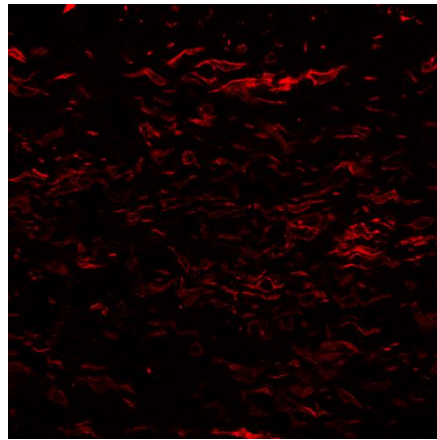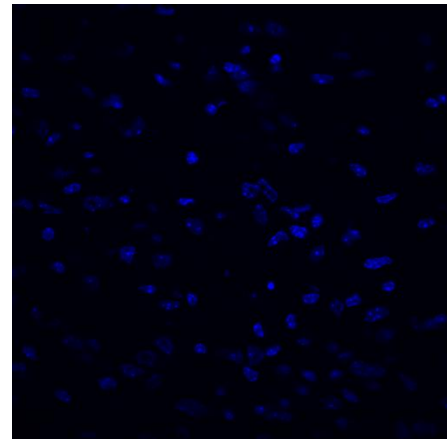

**Cpz+D-Asp**

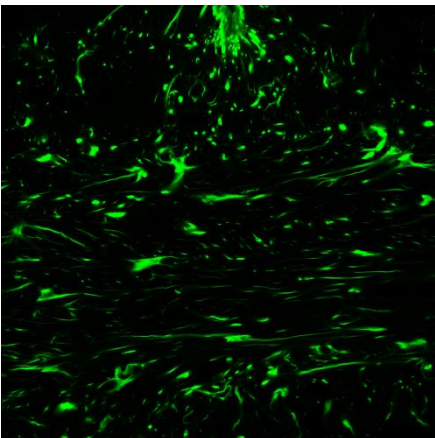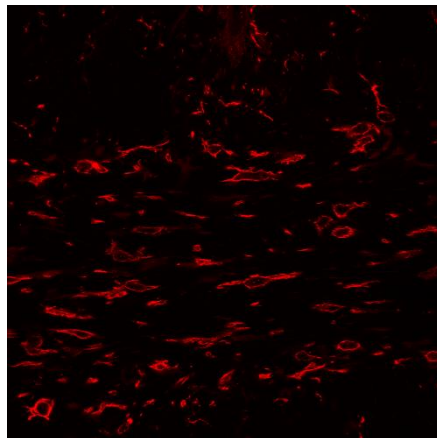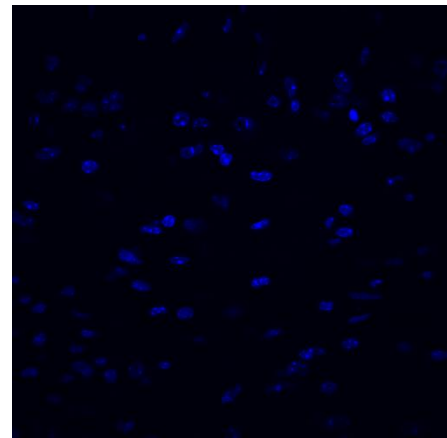

Supplement: EMMM-11-e9278-s005.pdf [file EMMM-11-e9278-s005.pdf]
