# Supplementary material for: D‐Aspartate treatment attenuates myelin damage and stimulates myelin repair
Source: PubMed Central journal article supplement (PMC6328990; doi:10.15252/emmm.201809278), 2018-12-17

Figure 8A

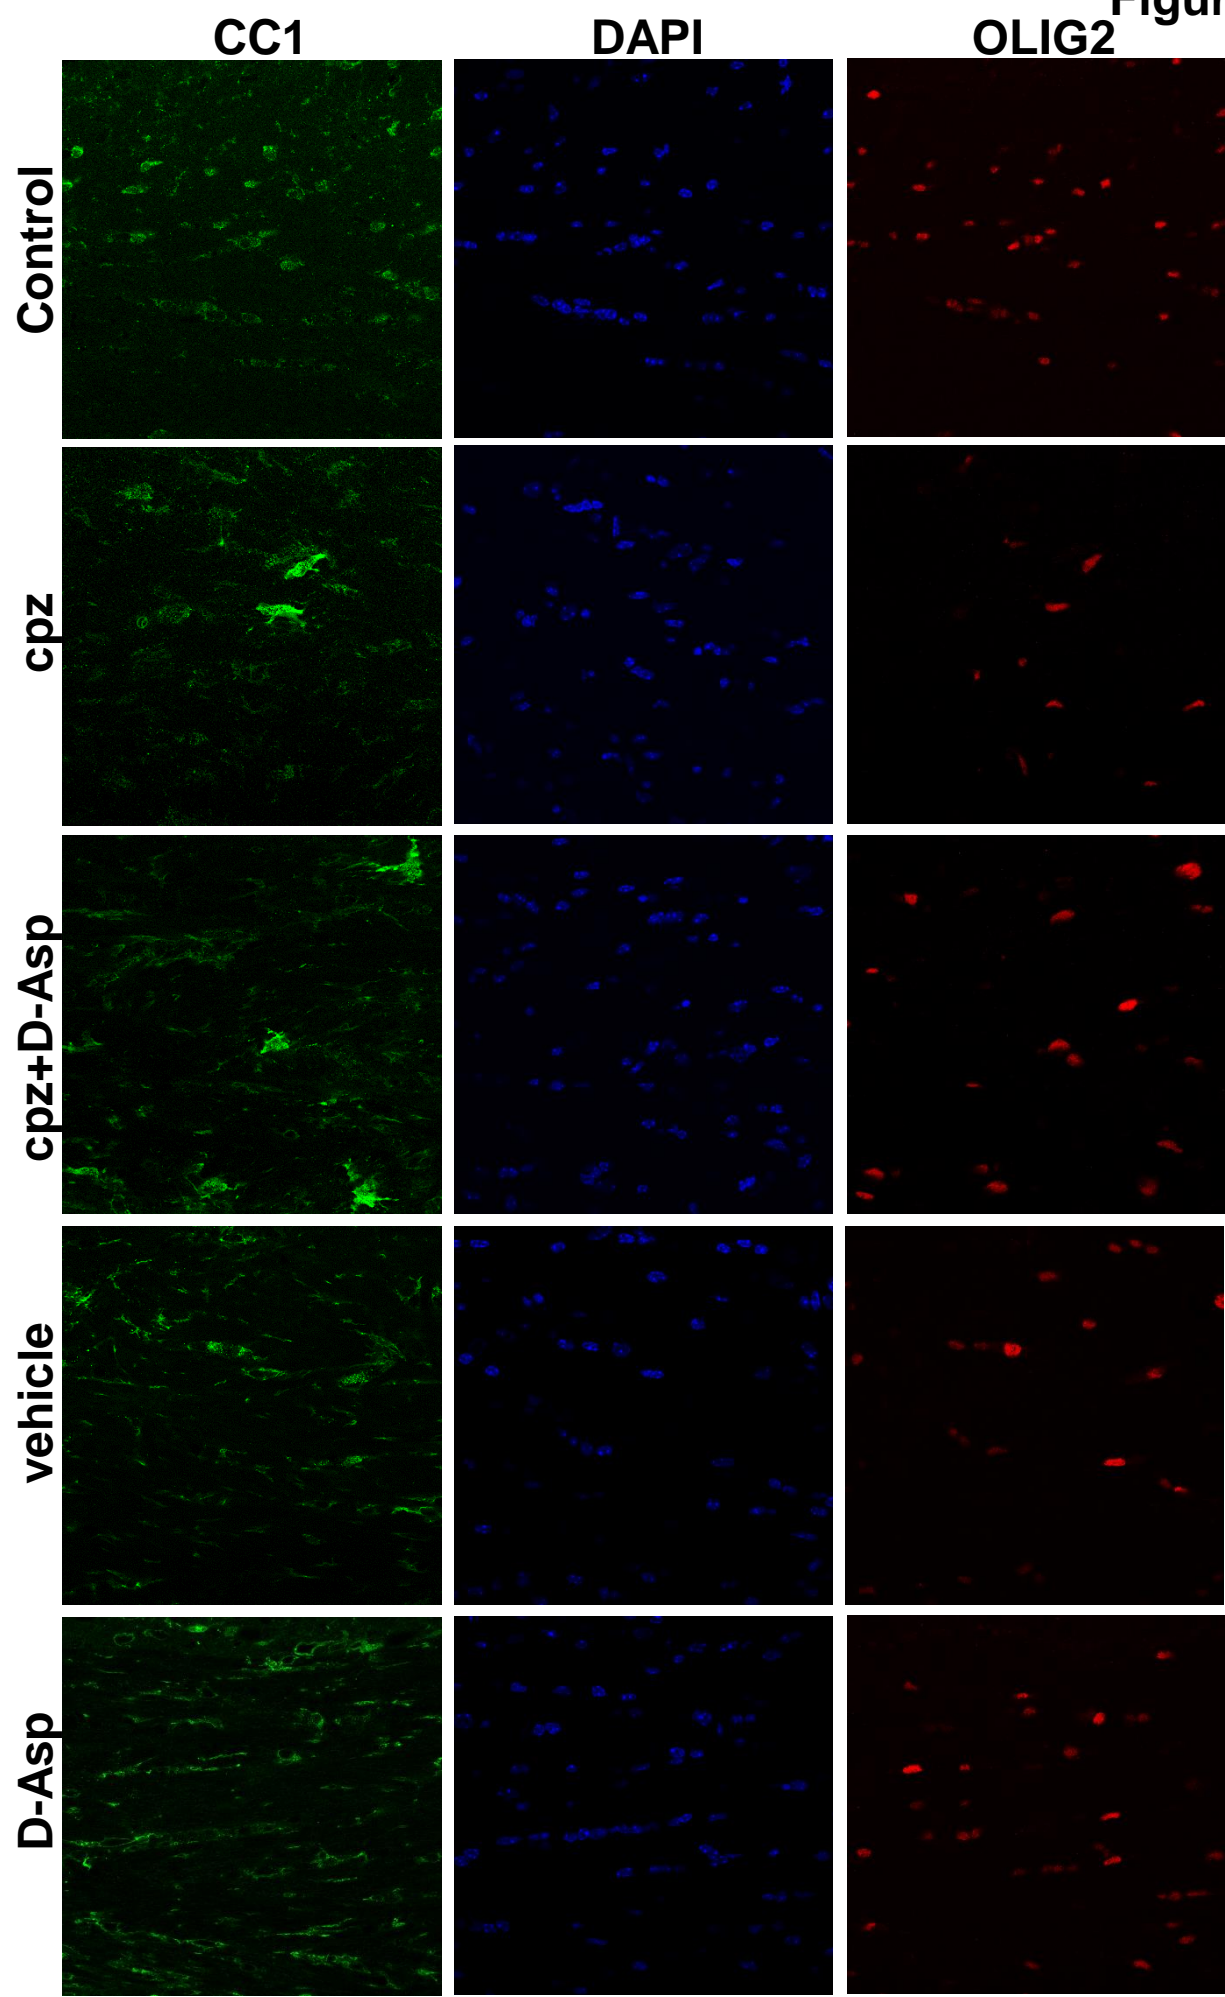

Supplement: EMMM-11-e9278-s006.pdf [file EMMM-11-e9278-s006.pdf]
